# Supplementary material for: The Impact of Digital Technology Application on Agricultural Low-Carbon Transformation – A Case Study of the Pesticide Reduction Effect of Plant Protection Unmanned Aerial Vehicles (UAVs)
Source: Preprints.org preprint supplement (doi:10.20944/preprints202410.1723.v1), 2024-10-23
Supplement: Supplementary file 1 [file supplementary]

Appendix 1:

## Ethics and Informed Consent

Acceptance number: JXAULL-202036

Date: October 22, 2020

|                                                                                                                                                                                                                                                                                                                                                                                                                                                                                                                                                                                                                       |                                                                                                                                                                                                                                                                                                                                                                                                                                                                                  |                   |                                    |            |                |
|-----------------------------------------------------------------------------------------------------------------------------------------------------------------------------------------------------------------------------------------------------------------------------------------------------------------------------------------------------------------------------------------------------------------------------------------------------------------------------------------------------------------------------------------------------------------------------------------------------------------------|----------------------------------------------------------------------------------------------------------------------------------------------------------------------------------------------------------------------------------------------------------------------------------------------------------------------------------------------------------------------------------------------------------------------------------------------------------------------------------|-------------------|------------------------------------|------------|----------------|
| <b>Name</b>                                                                                                                                                                                                                                                                                                                                                                                                                                                                                                                                                                                                           | Qian Deng                                                                                                                                                                                                                                                                                                                                                                                                                                                                        | <b>Department</b> | School of Economics and Management | <b>Tel</b> | +8613732998625 |
| <b>Funding</b>                                                                                                                                                                                                                                                                                                                                                                                                                                                                                                                                                                                                        | National Natural Science Foundation of China (grant number: 71573111)                                                                                                                                                                                                                                                                                                                                                                                                            |                   |                                    |            |                |
| <b>Reasons for application</b>                                                                                                                                                                                                                                                                                                                                                                                                                                                                                                                                                                                        | Academic communication, Paper presentation                                                                                                                                                                                                                                                                                                                                                                                                                                       |                   |                                    |            |                |
| <b>Paper title</b>                                                                                                                                                                                                                                                                                                                                                                                                                                                                                                                                                                                                    | The Impact of Plant Protection Unmanned Aerial Vehicle Spraying on Pesticide Intensity Application: A Case Study of Main Rice Producing Area of China                                                                                                                                                                                                                                                                                                                            |                   |                                    |            |                |
| <b>Research purpose</b>                                                                                                                                                                                                                                                                                                                                                                                                                                                                                                                                                                                               | The large pesticide dosage and low effective utilization rate not only lead to serious agricultural non-point source pollution and harm to the entire ecosystem but also make pesticides enter the human body through diffusion between environmental media and food chain transmission, increasing human health risks. Therefore, how to improve the level of scientific pesticide application becomes a significant issue on the road to sustainable agricultural development. |                   |                                    |            |                |
| <b>Research approach</b>                                                                                                                                                                                                                                                                                                                                                                                                                                                                                                                                                                                              | Based on the survey data of 455 rice farmers in Jiangxi Province, this paper uses OLS linear regression and propensity score matching (PSM) to analyze the impact of using plant protection UAV for spraying on pesticide application intensity and explore the different impacts of plant protection UAV spraying from the perspective of resource endowment differences among farmers, in order to provide a new breakthrough for the pesticide reduction.                     |                   |                                    |            |                |
| <b>Review comments:</b><br>1. This study does not fall within the scope of ethical research.<br>2. The authors use survey data from National Natural Science Foundation of China (grant number: 71573111) for analysis. The survey was conducted anonymously, and all participants were fully informed of the reasons for conducting the survey and the use of relevant data. No personal identity information was collected during the survey, and there were no conflicts of interest or potential risks for the rights holders.<br><br>Welfare Ethics Committee of Jiangxi Agricultural University (seal)<br>Date: |                                                                                                                                                                                                                                                                                                                                                                                                                                                                                  |                   |                                    |            |                |
